# Supplementary material for: EMIMBF4–GBL binary electrolyte working at −70 °C and 3.7 V for a high performance graphene-based capacitor
Source: Royal Society of Chemistry journal article supplement (doi:10.1039/c7ta10474j), 2018-01-01
Supplement: c7ta10474j1.pdf [file c7ta10474j1.pdf]

## Supporting information

**EMIMBF<sub>4</sub>–GBL binary electrolyte working at -70 °C and 3.7**

**V for a high performance graphene-based capacitor**

Jiarui Tian, Chaojie Cui, Qing Xie, Weizhong Qian\*, Chi

Xue, Yonghua Miao, Ying Jin, Gang Zhang, Baohua

Guo

## SI-1. Characterization methods

All NMR measurements were performed on a JNM-ECA600, Sodium 2,2-Dimethyl-2-silapentane-5-sulfonate (DSS) was dissolved in D<sub>2</sub>O as external standard ( $\delta_{\text{DSS}}=0$ ). ATR-IR spectra were recorded at room temperature on a Nicolet 6700FTIR (resolution: 0.35 cm<sup>-1</sup>) equipped with an ATR single reflection cell. The high-resolution scanning electron microscopy (SEM) observation was conducted on a JEOL, JSM-7401 at 3.0 kV. TEM experiment was performed on a high-resolution transmission electron microscope (JEOL, JEM-2010, exited at 120 kV). Brunauer–Emmett–Teller (BET) surface area was recorded in a Quantachrome automated surface area and porosity analyzer with N<sub>2</sub> as the adsorption gas. Differential scanning calorimetry (DSC) was obtained using a differential scanning calorimeter (DSC-60), from -80 to 35 °C at a heating rate of 10 °C min<sup>-1</sup>. The viscosities of binary electrolytes were measured by an MCR301 rheometer (Anton Paar) using a conical geometry, shear rate was set at 100 s<sup>-1</sup>. An FE28 conductivity meter (Mettler-Toledo) was used for conductivity measurement of the electrolytes.

SI-2. Relationship between the viscosity and ionic conductivity.

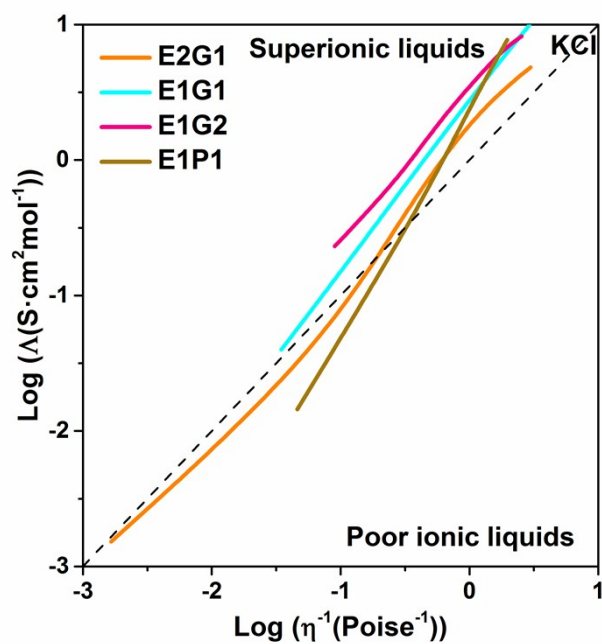

Figure S1. Walden plots of different binary electrolytes.

## SI-3. NMR characterization

### 3.1 NMR spectra of different electrolytes

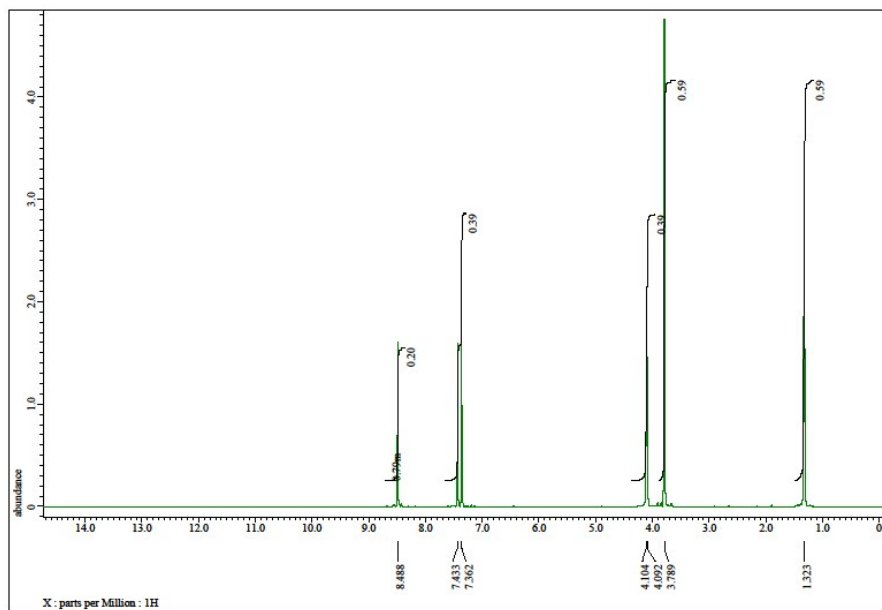

Figure S2-1. NMR pattern of pure EMIMBF<sub>4</sub>(E).

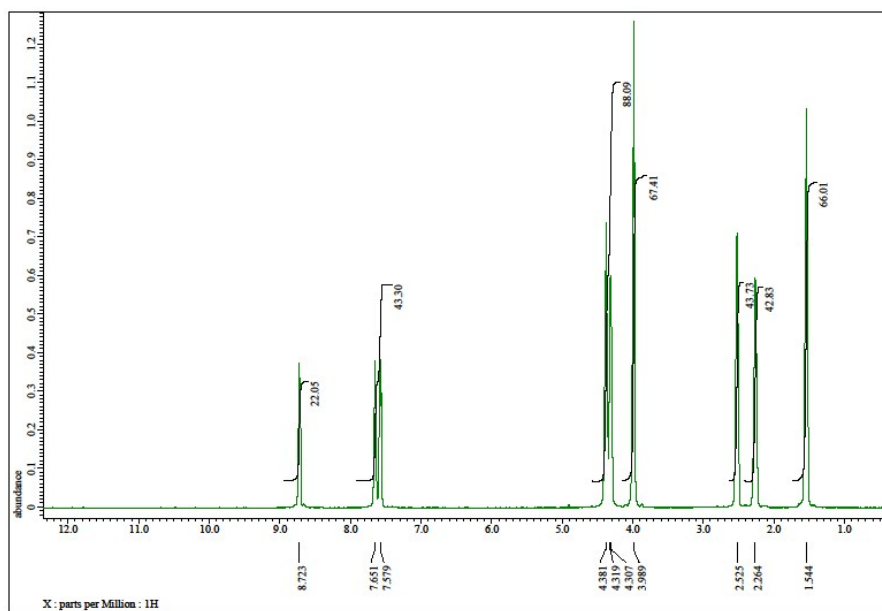

Figure S2-2. NMR pattern of E2G1.

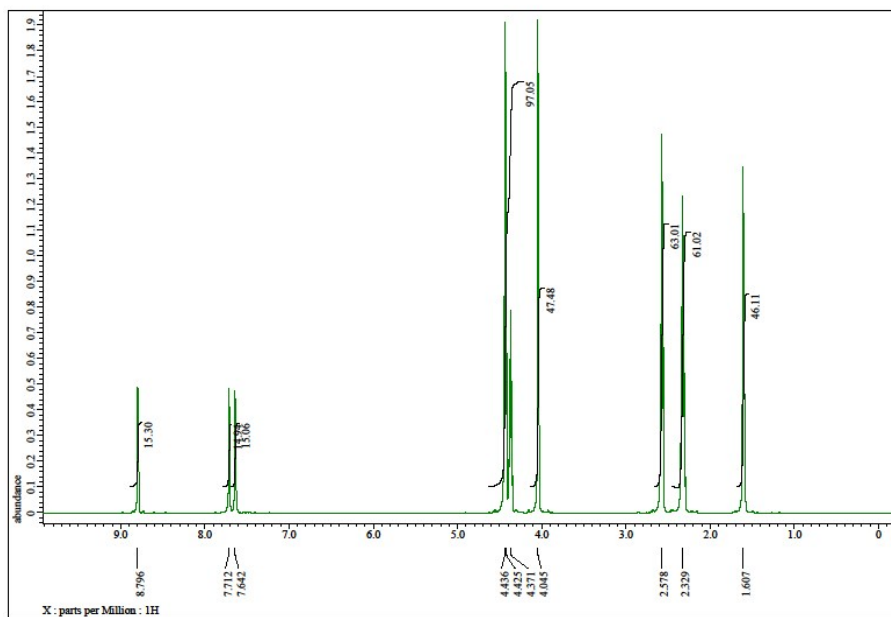

Figure S2-3. NMR pattern of E1G1.

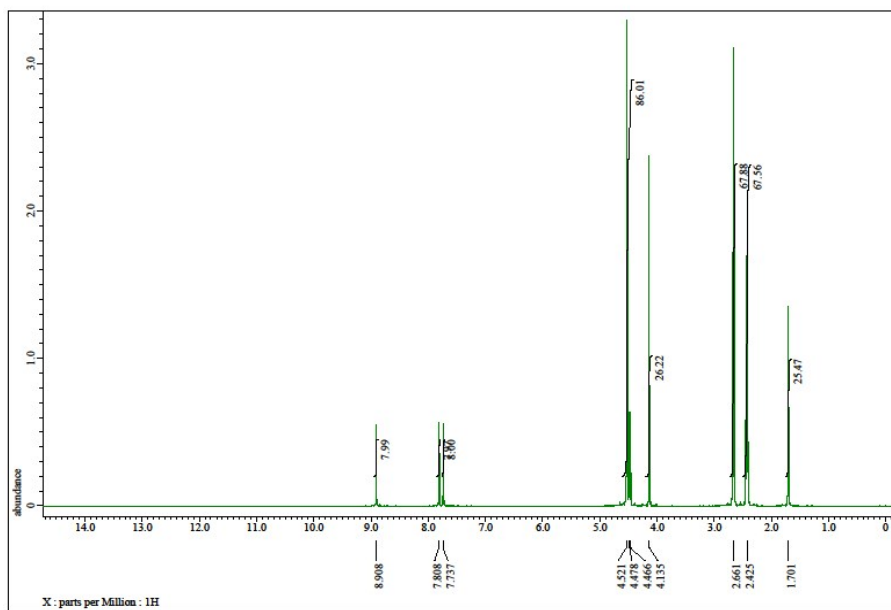

Figure S2-4. NMR pattern of E1G2.

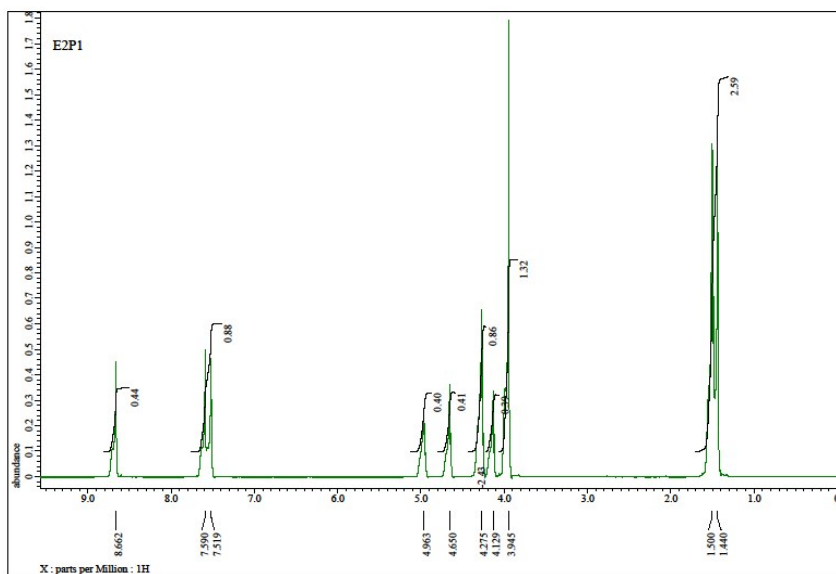

Figure S2-5. NMR pattern of E2P1.

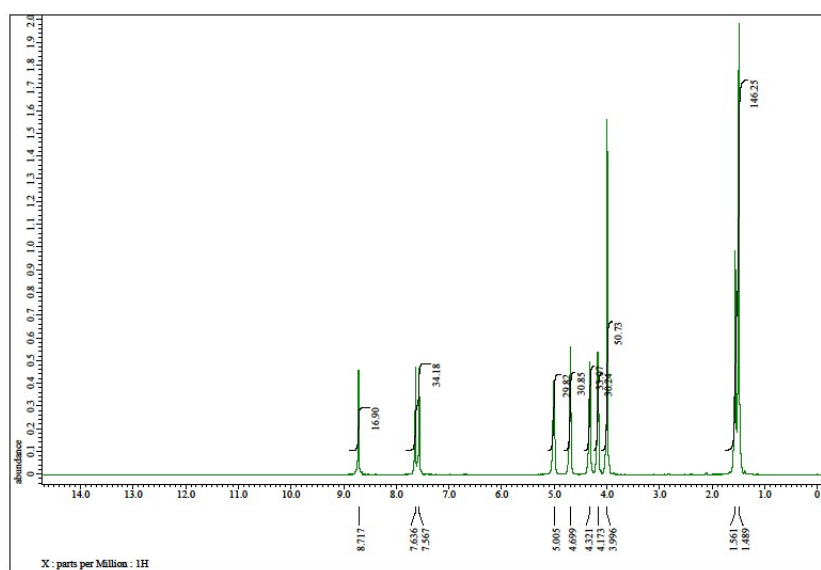

Figure S2-6. NMR pattern of E1P1.

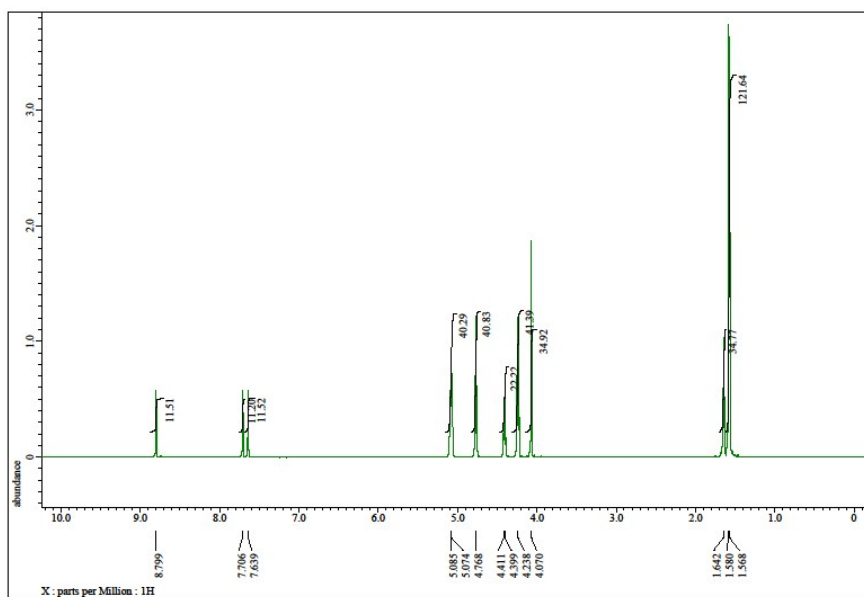

**Figure S2-7.** NMR pattern of E1P2.

## SI-4. ATR-IR results

### 4.1 ATR-IR spectra

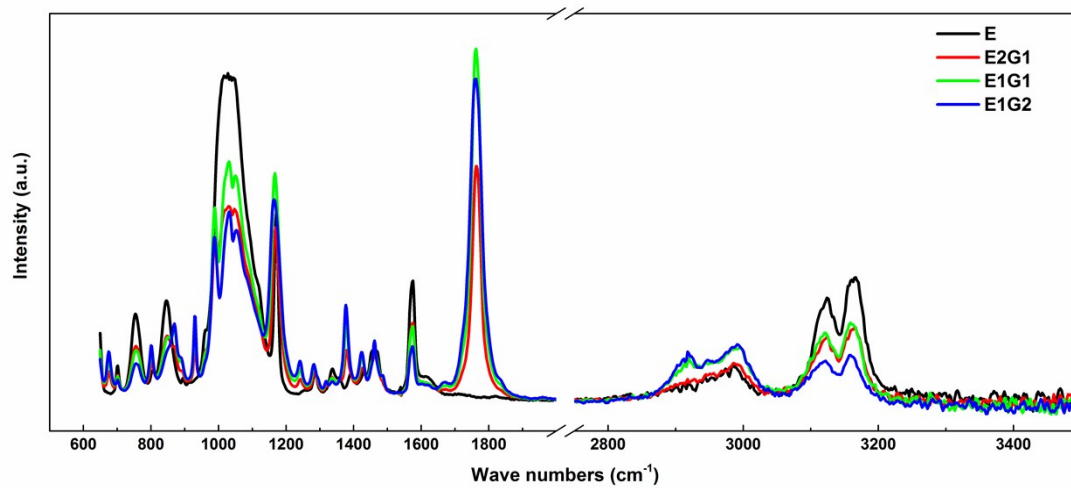

**Figure S3-1.** ATR-IR of EMIMBF<sub>4</sub> and binary electrolytes of EMIMBF<sub>4</sub>-GBL.

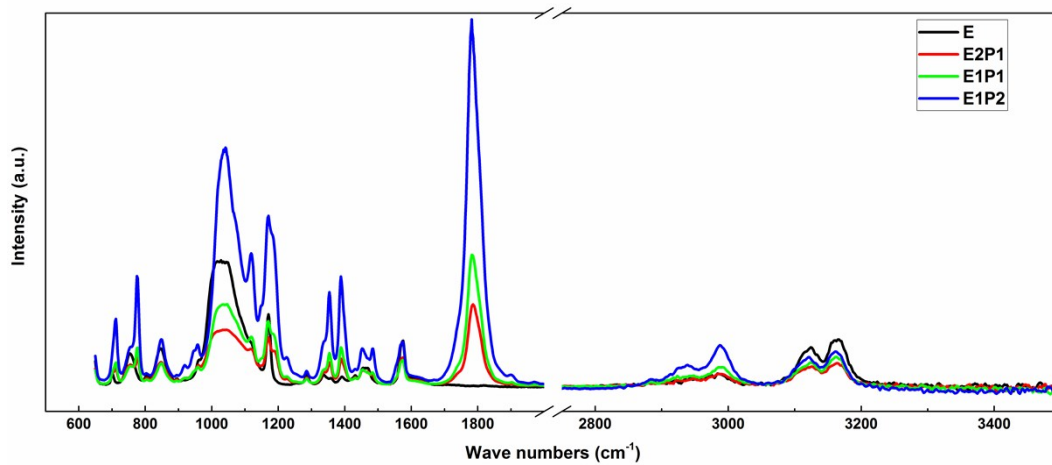

**Figure S3-2.** ATR-IR of EMIMBF<sub>4</sub> and binary electrolytes of EMIMBF<sub>4</sub>-PC.



SI-5. EIS fittings by the model of Randles circuit.

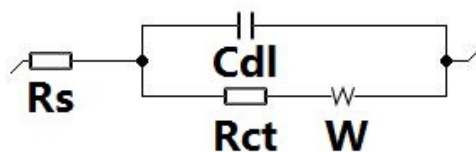

Figure S4. EIS fittings by the model of Randles circuit.

Table S1. Fitting data of resistance in different electrolytes at different temperatures.

| Electrolyte | Temperature (°C) | Rs (Ω) | Rct (Ω)            | W (Ω·s <sup>0.5</sup> ) |
|-------------|------------------|--------|--------------------|-------------------------|
| E           | 20               | 4.3    | nearly disappeared | 3.0                     |
|             | 10               | 10.3   | 0.7                | 10.0                    |
|             | -10              | 18.5   | 0.9                | 15.1                    |
| E1G1        | 20               | 1.3    | 0.6                | 1.0                     |
|             | -30              | 2.9    | 0.5                | 8.0                     |
|             | -50              | 5.8    | 1.0                | 29.0                    |
|             | -70              | 33.4   | 9.6                | 245.0                   |

### SI-6. Capacitance and energy density of GNF in E1G1.

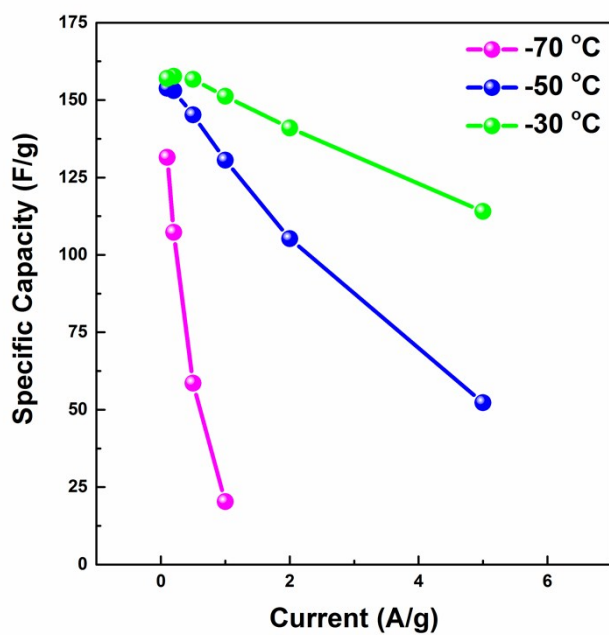

Figure S5-1. Specific capacitance of E1G1 EDLC at various current density.

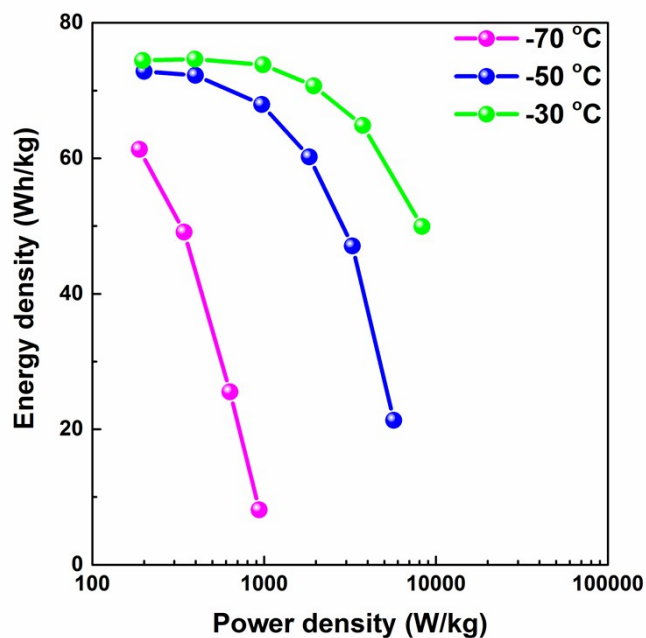

Figure S5-2. Energy density of E1G1 EDLC at different power density.

SI-7. Linear fitting of  $\text{Ln}\sigma$  with  $1000/(T-T_g)$ .

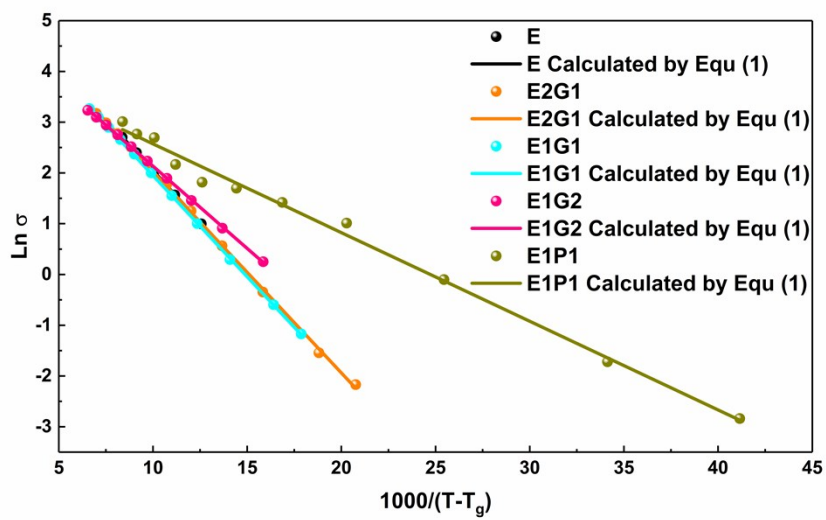

**Figure S6.** Fitting plot of conductivities of mixture electrolytes and pure EMIMBF<sub>4</sub>.

**SI-8.** Electrochemical performance of previously reported low-temperature high-voltage electrolytes and EIG1.

**Table S2.** Electrochemical performance of previously reported low-temperature high-voltage electrolytes and EIG1.

| Electrolyte                                                                   | Electrode                                            | Potential/V | $C_{\text{electrode}}/\text{F g}^{-1}$ | $E_{\text{sc}}/\text{W h kg}^{-1}$<br>a) | Temperature/ $^{\circ}\text{C}$ | Current density/<br>scan rate | Ref       |
|-------------------------------------------------------------------------------|------------------------------------------------------|-------------|----------------------------------------|------------------------------------------|---------------------------------|-------------------------------|-----------|
| <b>EMIMBF<sub>4</sub>-GBL (EIG1)</b>                                          | GNF<br>(1274 m <sup>2</sup><br>g <sup>-1</sup> )     | 3.7         | 157                                    | 73.8                                     | -30                             | 0.5 A g <sup>-1</sup>         | This work |
|                                                                               |                                                      |             | 153                                    | 72.3                                     | -50                             | 0.2 A g <sup>-1</sup>         |           |
|                                                                               |                                                      |             | 131                                    | 61.3                                     | -70                             | 0.1 A g <sup>-1</sup>         |           |
| <b>(PIP<sub>13</sub>FSI)<sub>0.5</sub>(PYR<sub>14</sub>FSI)<sub>0.5</sub></b> | Reduced<br>graphene<br>film                          | 3.5         | 135                                    | 57.4                                     | 0                               | 1 mV s <sup>-1</sup>          | 29        |
|                                                                               |                                                      |             | 125                                    | 53.1                                     | -20                             |                               |           |
|                                                                               |                                                      |             | 96                                     | 40.8                                     | -30                             |                               |           |
|                                                                               |                                                      |             | 55                                     | 23.4                                     | -40                             |                               |           |
| <b>(PIP<sub>13</sub>FSI)<sub>0.5</sub>(PYR<sub>14</sub>FSI)<sub>0.5</sub></b> | a-MEGO<br>(~2000<br>m <sup>2</sup> g <sup>-1</sup> ) | 3.5         | 130                                    | 40.6                                     | Room temperature                | 20 mV s <sup>-1</sup>         | 30        |
|                                                                               |                                                      |             | 120                                    | 37.5                                     | -40                             | 1 mV s <sup>-1</sup>          |           |
|                                                                               |                                                      | 3           | 100                                    | 31.25                                    | -50                             |                               |           |
| <b>(BMIBF<sub>4</sub>)<sub>0.5</sub>(BMPBF<sub>4</sub>)<sub>0.5</sub></b>     | A-NPG                                                | 3.5         | 109                                    | -                                        | Room temperature                | 5 mV s <sup>-1</sup>          | 31        |
|                                                                               |                                                      |             | 92                                     | 46.4                                     | -50                             |                               |           |
| <b>SBPBF<sub>4</sub>+AN/DBC-20%</b>                                           | AC                                                   | 2.7         | 117                                    | 27.8                                     | 20                              | 0.1 A g <sup>-1</sup>         | 32        |
|                                                                               |                                                      |             | 117                                    | 26.6                                     | -40                             |                               |           |
|                                                                               |                                                      |             | 116                                    | 25.8                                     | -50                             |                               |           |
|                                                                               |                                                      |             | 114                                    | 22.8                                     | -60                             |                               |           |
| <b>PYRNO<sub>3</sub>+GBL</b>                                                  | AC(~1500<br>m <sup>2</sup> g <sup>-1</sup> )         | 2           | 129                                    | 17.4                                     | 20                              | 0.17 A g <sup>-1</sup>        | 47        |
|                                                                               |                                                      |             | 119                                    | 16.5                                     | -40                             |                               |           |
| <b>DAIMBF<sub>4</sub>+PC</b>                                                  | AC(~2400<br>m <sup>2</sup> /g)                       | 2.5         | 37                                     | 8.0                                      | 25                              | 0.32 A g <sup>-1</sup>        | 48        |
|                                                                               |                                                      |             | 30                                     | 6.5                                      | -30                             |                               |           |
| <b>PYR<sub>14</sub>TFSI+BuCN</b>                                              | AC(~3000<br>m <sup>2</sup> /g)                       | 2.5         | 130                                    | 28.2                                     | 25                              | 0.5 A g <sup>-1</sup>         | 49        |
|                                                                               |                                                      |             | 125                                    | 27.1                                     | -20                             |                               |           |

a) Calculated by formulas:  $E_{\text{capacitor}} = C_{\text{capacitor}} U^2 / 2$  ;  $C_{\text{capacitor}} = C / 4$
